# Supplementary material for: Harmful and Harmless Soil-Dwelling Fungi Indicate Microhabitat Suitability for Off-Host Ixodid Ticks
Source: MDPI journal article supplement (doi:10.3390/microorganisms12030609), 2024-03-19
Supplement: s1 [file s1]

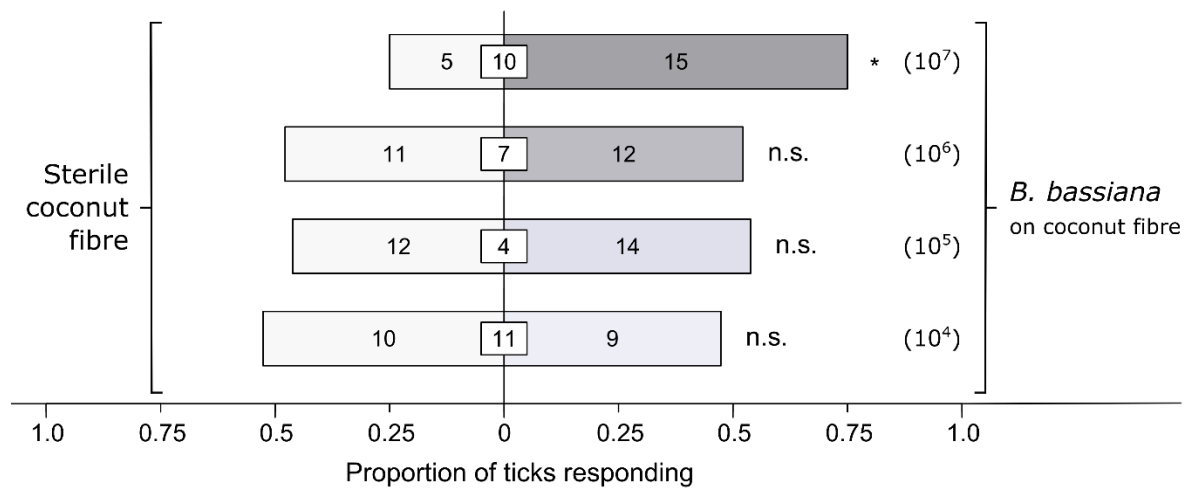

Supplementary Figure S1. Effect of dose (conidia/mL) of a *Beauveria bassiana* spore suspension on behavioral responses of female black-legged ticks, *Ixodes scapularis*. In olfactometer bioassays (Fig. 1), ticks were offered a choice between coconut fibre treated, or not (control), with a 1-mL *B. bassiana* spore suspension of  $10^4$ ,  $10^5$ ,  $10^6$ , or  $10^7$  conidia/mL incubated 24 h before bioassays. The control coconut fibre was treated with sterile 0.05% Tween80 (1 mL). Numbers in bars represent the total number of ticks choosing a stimulus, and numbers in white inset boxes represent the total number of non-responding ticks. Asterisks indicate significant arrestment behavior on coconut fibre treated with the fungal spore suspension (exact binomial tests; \*  $p < 0.05$ ; n. s. = not significant).
